# Supplementary material for: Nanoflake NiMn Layered Double Hydroxide Coated on Porous Membrane-like Ni-Foam for Sustainable and Efficient Electrocatalytic Oxygen Evolution
Source: MDPI journal article supplement (doi:10.3390/membranes13090748), 2023-08-22
Supplement: s1 [file s1]

Supplementary Materials

# Nanoflake NiMn Layered Double Hydroxide Coated on Porous Membrane-like Ni-Foam for Sustainable and Efficient Electrocatalytic Oxygen Evolution

Verjesh Kumar Magotra <sup>1</sup>, Arjun Magotra <sup>2</sup>, Sawanta S. Mali <sup>3</sup>, H. C. Jeon <sup>1</sup>, T. W. Kang <sup>1</sup>, Amol S. Salunke <sup>4</sup>, Chang Kook Hong <sup>3</sup>, Nabeen K. Shrestha <sup>4</sup>, Hyunsik Im <sup>4</sup> and Akbar I. Inamdar <sup>4,\*</sup>

<sup>1</sup> Quantum-Functional Semiconductor Research Center, Dongguk University, Seoul, Republic of Korea

<sup>2</sup> Department of Computer Science and Engineering, Faculty of Engineering and Technology, Jain (Deemed-to-be University), Bengaluru 562112, India

<sup>3</sup> Polymer Energy Materials Laboratory, School of Applied Chemical Engineering, Chonnam National University, Gwangju 500-757, Republic of Korea

<sup>4</sup> Division of Physics and Semiconductor Science, Dongguk University, Seoul 04620, Republic of Korea

\* Correspondence: akbarphysics@dongguk.edu

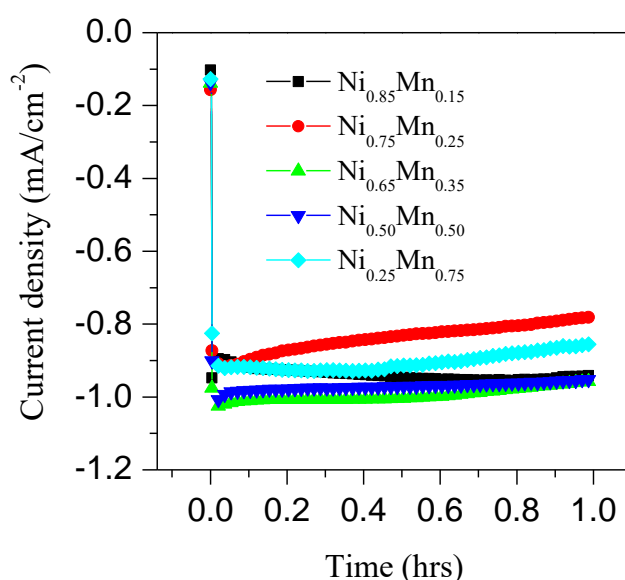

**Figure S1.** Chronoamperometric curves for the electrodeposition of the  $\text{Ni}_{1-x}\text{Mn}_x$  LDH (where  $x = 0.15, 0.25, 0.35, 0.50$  and  $0.75$ ) thin film electrodes.

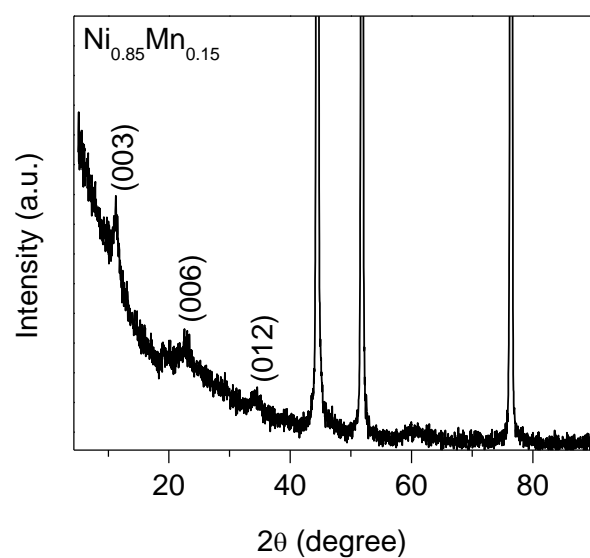

**Figure S2.** Typical XRD pattern of the  $\text{Ni}_{0.65}\text{Mn}_{0.35}$  thin film electrode, with clear diffraction peak at  $11.20^\circ$ ,  $23.04^\circ$ , and  $34.46^\circ$  suggesting formation of the NiMn LDH (JCPDS No. 38-0715) structure.

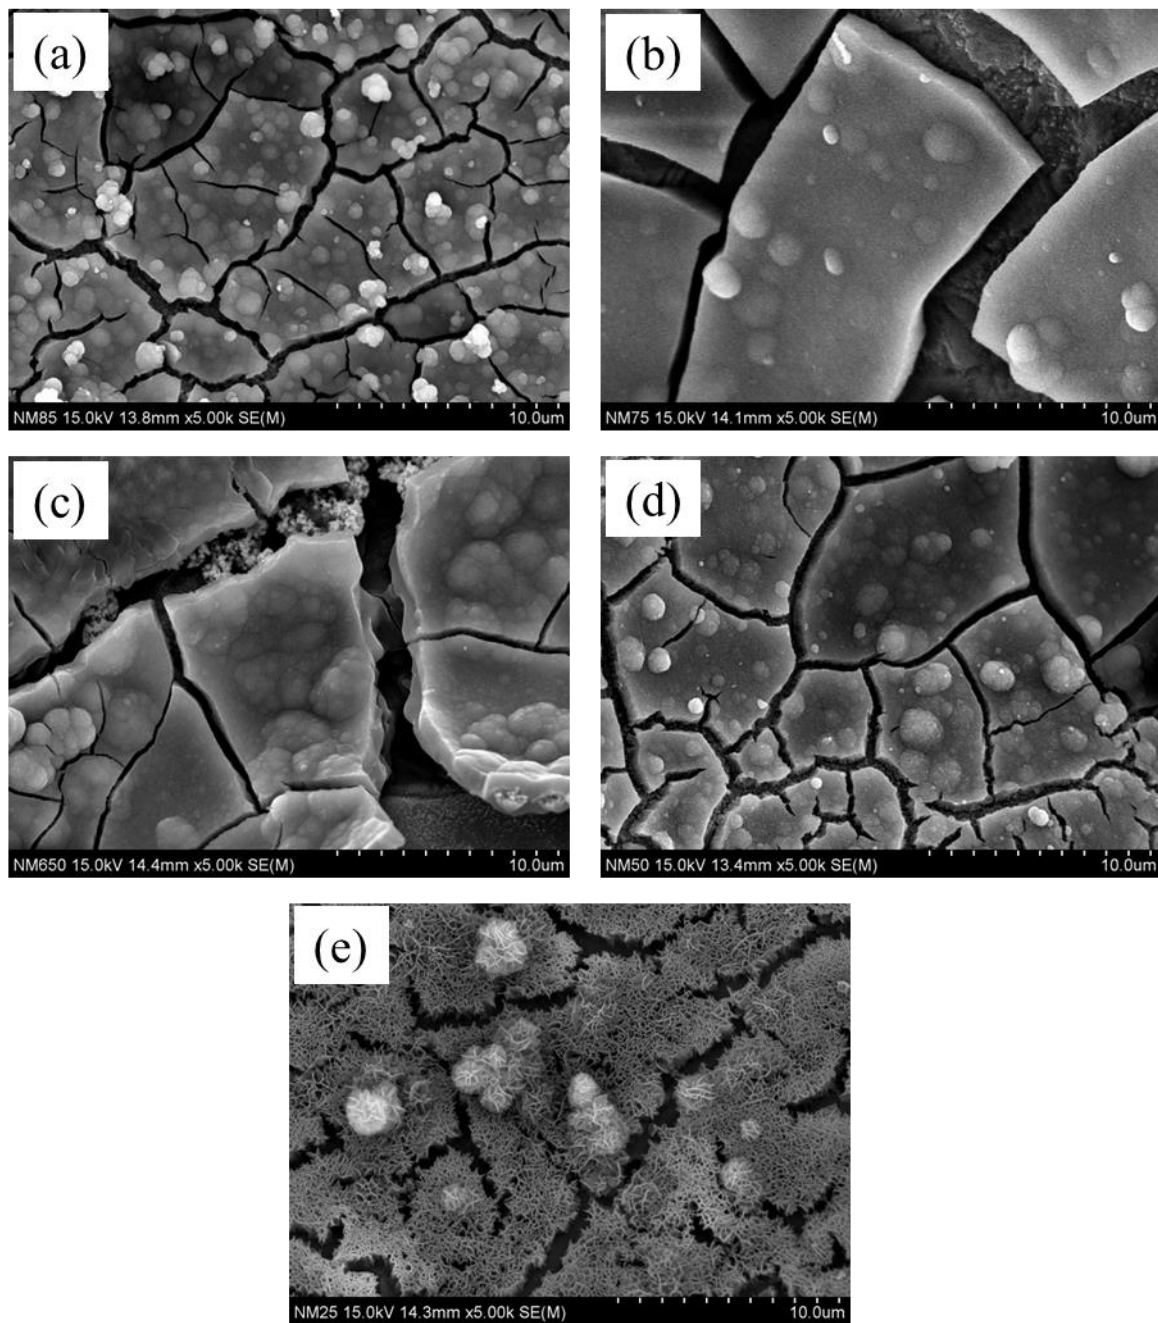

**Figure S3.** low magnification SEM images of the  $\text{Ni}_{1-x}\text{Mn}_x$  LDH thin film electrodes. (a)  $\text{Ni}_{0.85}\text{Mn}_{0.15}$ , (b)  $\text{Ni}_{0.75}\text{Mn}_{0.25}$ , (c)  $\text{Ni}_{0.65}\text{Mn}_{0.35}$ , (d)  $\text{Ni}_{0.50}\text{Mn}_{0.50}$  and (e)  $\text{Ni}_{0.25}\text{Mn}_{0.75}$ . All the samples showed the existence of the cracks in the sample.

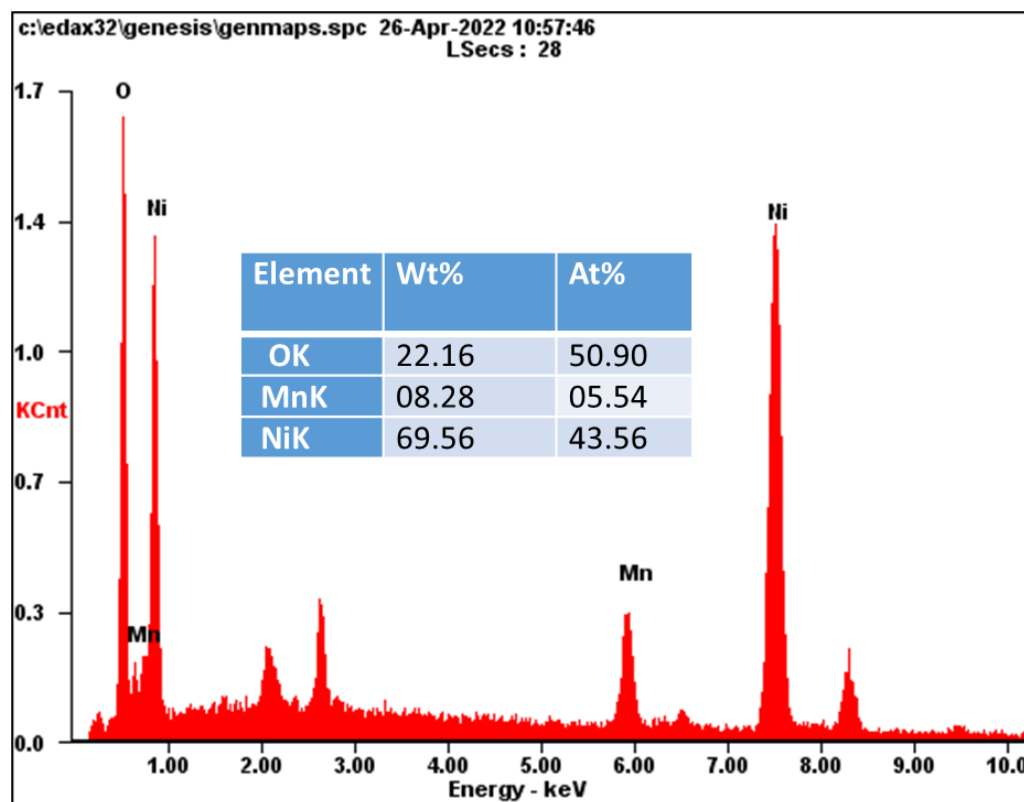

**Figure S4.** Energy dispersive X-ray analysis (EDX) of the NiMn LDH thin film catalyst to detect the elemental composition. It suggests the presence of the Ni, Mn, and O in the sample.

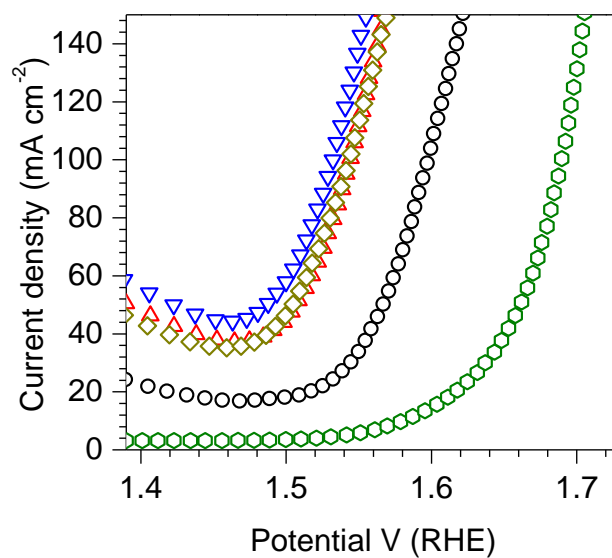

**Figure S5.** Enlarged view of the of the *iR*-corrected LSV curves of Ni<sub>1-x</sub>Mn<sub>x</sub> LDH thin film electrodes.

**Table S1.** Estimated OER parameters of the Ni<sub>1-x</sub>Mn<sub>x</sub> LDH thin film electrodes in terms of the overpotential at different current densities and Tafel slopes.

| Catalysts                                 | Overpotential (mV)     |                         |                         | Tafel Slope<br>mV dec <sup>-1</sup> |
|-------------------------------------------|------------------------|-------------------------|-------------------------|-------------------------------------|
|                                           | 50 mA cm <sup>-2</sup> | 100 mA cm <sup>-2</sup> | 200 mA cm <sup>-2</sup> |                                     |
| <b>Ni<sub>0.85</sub>Mn<sub>0.15</sub></b> | 336                    | 367                     | 410                     | 149                                 |
| <b>Ni<sub>0.75</sub>Mn<sub>0.25</sub></b> | 277                    | 315                     | 350                     | 138                                 |
| <b>Ni<sub>0.65</sub>Mn<sub>0.35</sub></b> | <b>253</b>             | <b>299</b>              | <b>342</b>              | <b>130</b>                          |
| <b>Ni<sub>0.50</sub>Mn<sub>0.50</sub></b> | 268                    | 310                     | 359                     | 134                                 |
| <b>Ni<sub>0.25</sub>Mn<sub>0.75</sub></b> | 429                    | 460                     | 484                     | 142                                 |

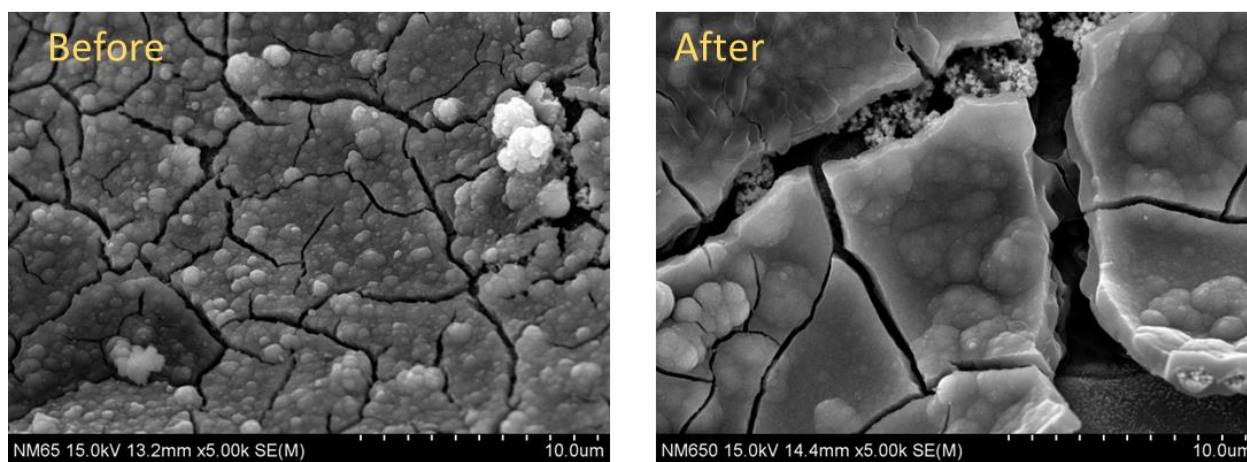**Figure S6.** SEM images of the best performing Ni<sub>0.65</sub>Mn<sub>0.35</sub> catalyst before and after stability test.

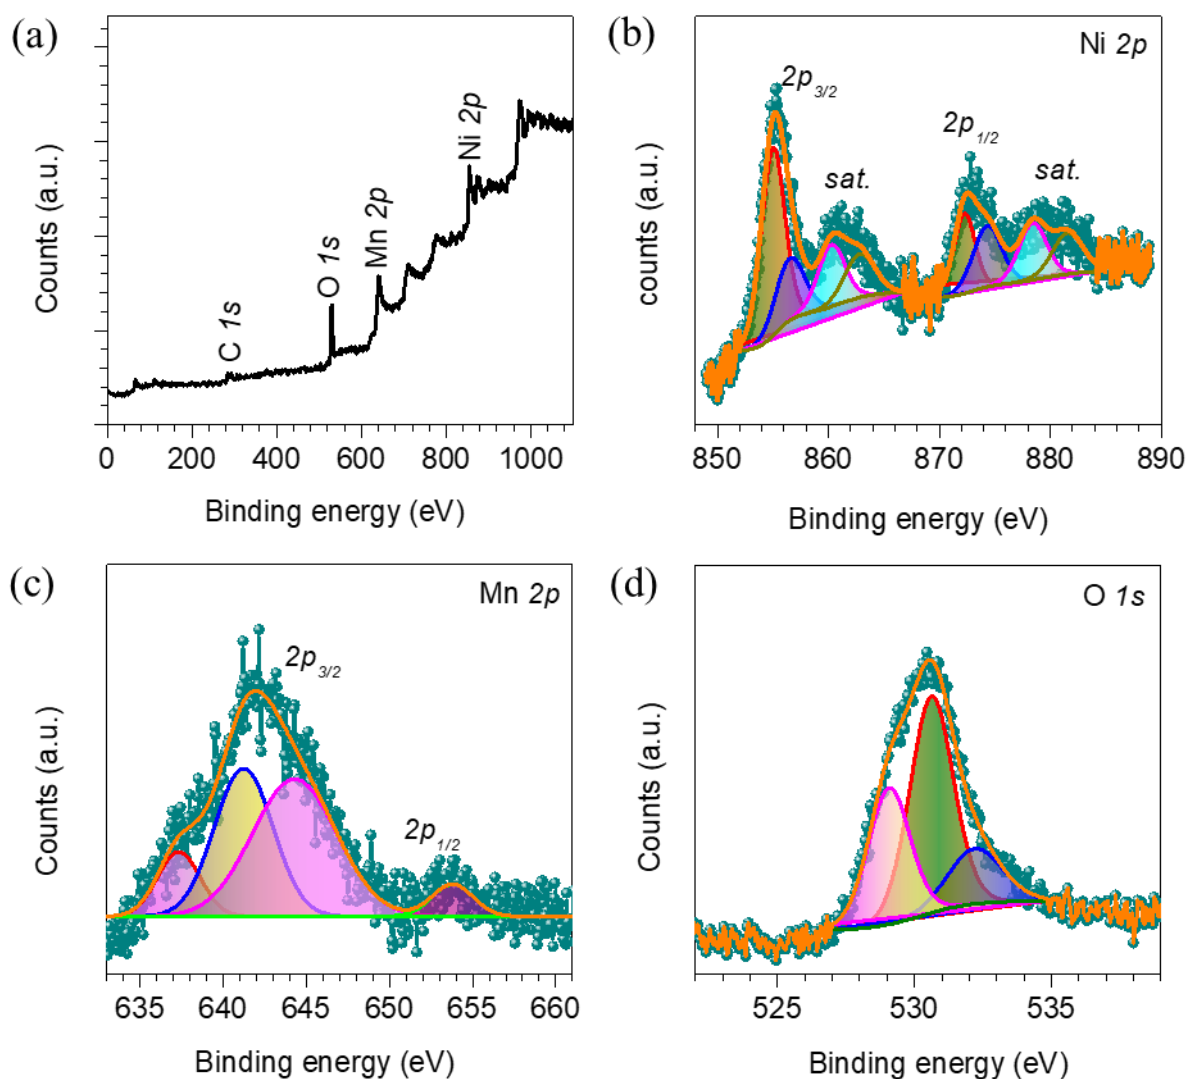

**Figure S7.** X-ray photoelectron spectroscopy data of the best performing  $\text{Ni}_{0.65}\text{Mn}_{0.35}$  thin film electrode after long term OER test of 20 hours. (a) survey spectra indicating presence of Ni, Mn, C and O in the catalysts, deconvoluted spectra of the (b) Ni 2p, (c) Mn 2p, (d) O 1s.

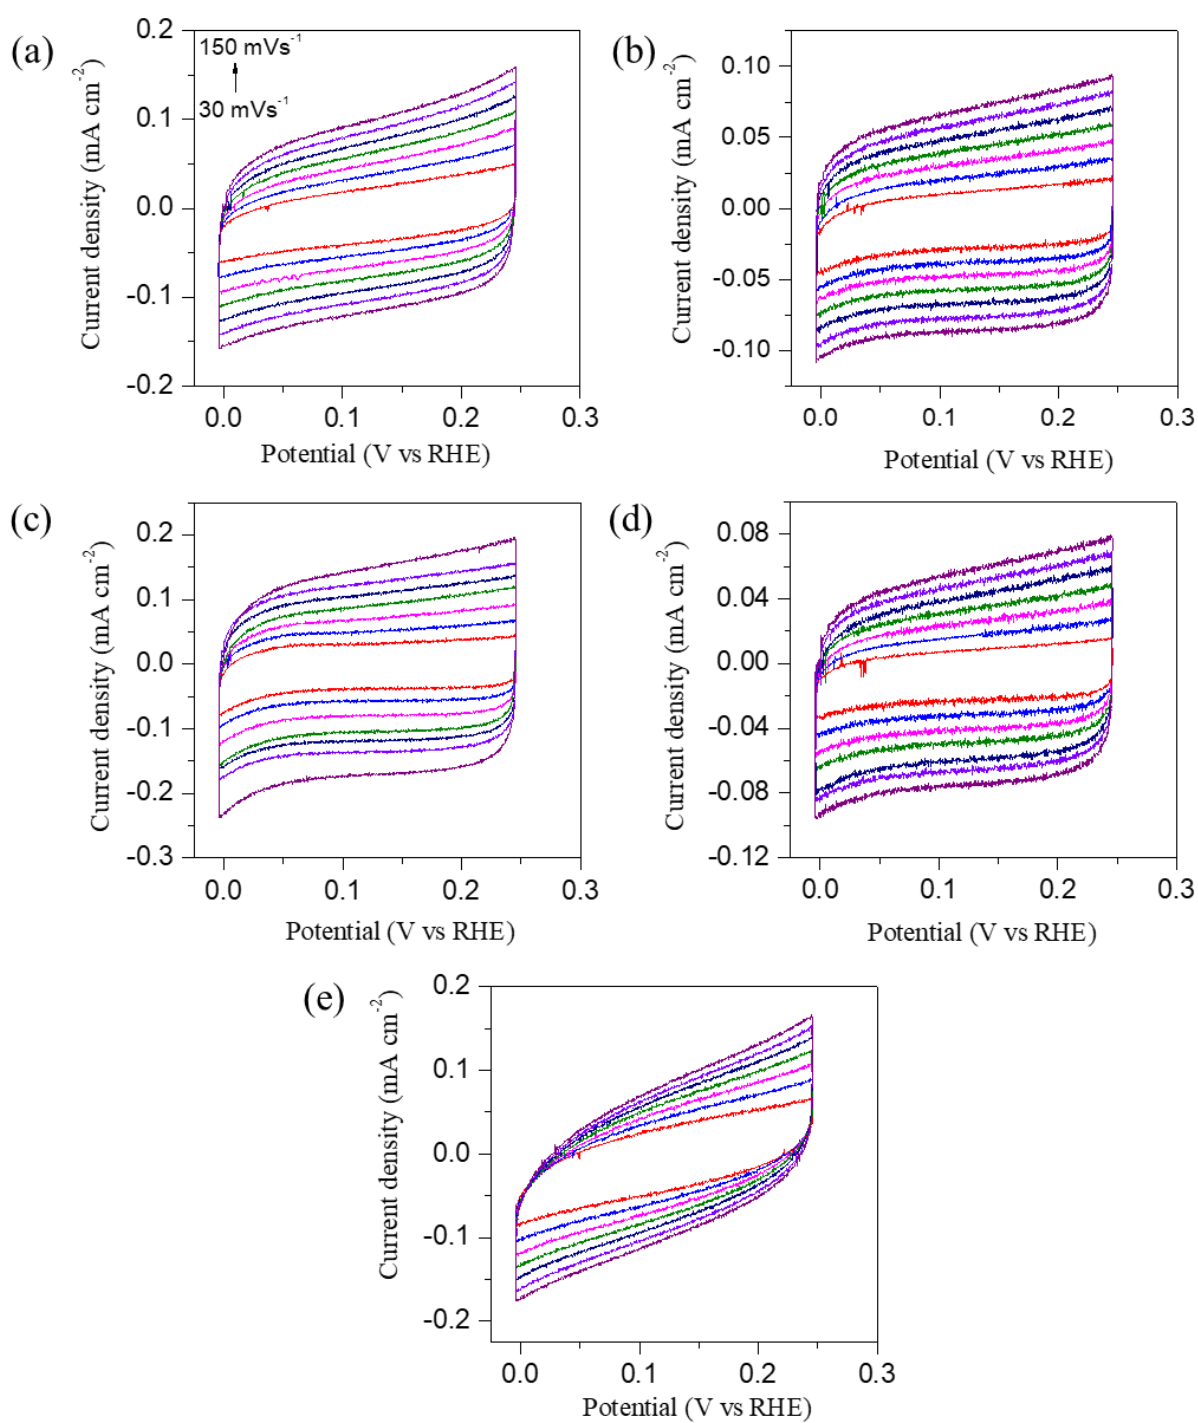

**Figure S8.** CV curves recorded in the non-Faradaic voltage region in 1 M KOH electrolyte at different scan rates of 30, 50, 70, 90, 110, 130 and 150  $\text{mV s}^{-1}$ . (a)  $\text{Ni}_{0.85}\text{Mn}_{0.15}$ , (b)  $\text{Ni}_{0.75}\text{Mn}_{0.25}$ , (c)  $\text{Ni}_{0.65}\text{Mn}_{0.35}$ , (d)  $\text{Ni}_{0.50}\text{Mn}_{0.50}$  and (e)  $\text{Ni}_{0.25}\text{Mn}_{0.75}$ .

**Table S2.** Double layer capacitance and ECSA of the  $\text{Ni}_{1-x}\text{Mn}_x$  LDH thin film electrodes estimated from the plot of the scan rate ( $\text{mVs}^{-1}$ ) versus current density ( $\text{mAcm}^{-2}$ ).

| Sample                             | Double-Layer Capacitances<br>( $\text{mF cm}^{-2}$ ) | ECSA ( $\text{cm}^2$ ) |
|------------------------------------|------------------------------------------------------|------------------------|
| $\text{Ni}_{0.85}\text{Mn}_{0.15}$ | 0.60                                                 | 15.00                  |
| $\text{Ni}_{0.75}\text{Mn}_{0.25}$ | 0.49                                                 | 12.25                  |
| $\text{Ni}_{0.65}\text{Mn}_{0.35}$ | <b>0.93</b>                                          | <b>23.25</b>           |
| $\text{Ni}_{0.50}\text{Mn}_{0.50}$ | 0.39                                                 | 9.75                   |
| $\text{Ni}_{0.25}\text{Mn}_{0.75}$ | 0.36                                                 | 9.00                   |

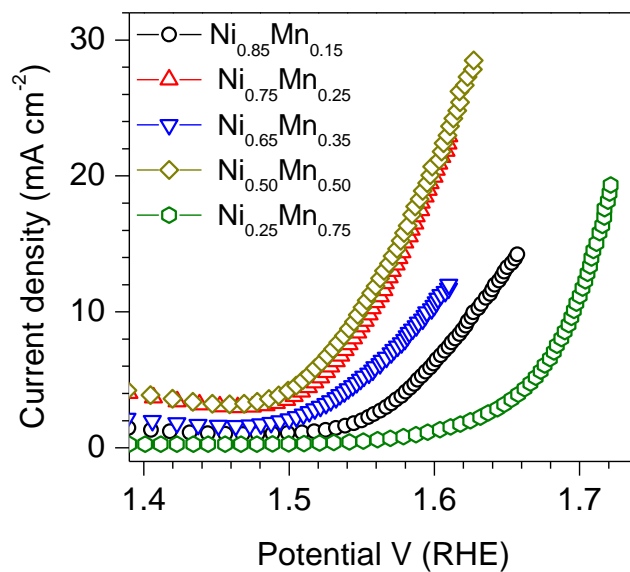

**Figure S9.**  $iR$ -corrected LSV curves of the  $\text{Ni}_{1-x}\text{Mn}_x$  LDH thin film electrodes normalized with the ECSA values to know its intrinsic catalytic activity.

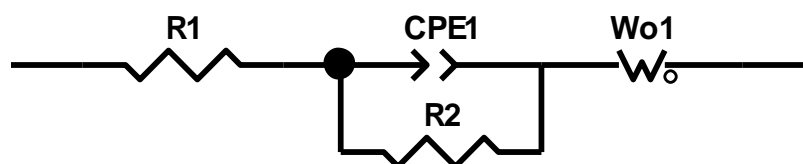

**Figure S10.** Equivalent circuit diagram used to fit the Nyquist plots to estimate solution resistance ( $R1$ ), charge transfer resistance ( $R2$ ), Warburg impedance ( $Wo$ ) and constant phase element ( $CPE$ ).



**Table S3.** EIS parameters of the Ni<sub>1-x</sub>Mn<sub>x</sub> LDH thin film electrode estimated after fitting of the Nyquist plots.

| Sample                                    | <i>R1</i> ( $\Omega$ ) | <i>R2</i> $\Omega$ | <i>CPE</i> |
|-------------------------------------------|------------------------|--------------------|------------|
| <b>Ni<sub>0.85</sub>Mn<sub>0.15</sub></b> | 1.19                   | 83.56              | 0.85       |
| <b>Ni<sub>0.75</sub>Mn<sub>0.25</sub></b> | 1.13                   | 11.45              | 0.79       |
| <b>Ni<sub>0.65</sub>Mn<sub>0.35</sub></b> | 1.11                   | 19.55              | 0.72       |
| <b>Ni<sub>0.50</sub>Mn<sub>0.50</sub></b> | 1.12                   | 16.24              | 0.85       |
| <b>Ni<sub>0.25</sub>Mn<sub>0.75</sub></b> | 1.08                   | 22.68              | 0.63       |
